# Supplementary material
Source: Springer Nature journal article supplement (https://www.springermedizin.de/resource/supplementary/12885_2011_2985_MOESM2_ESM.pdf/9462474)

FFPE

HOPE

Frozen

a

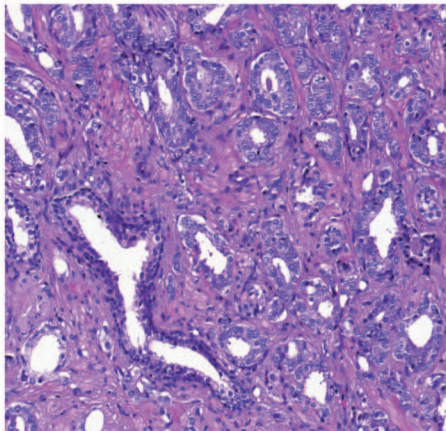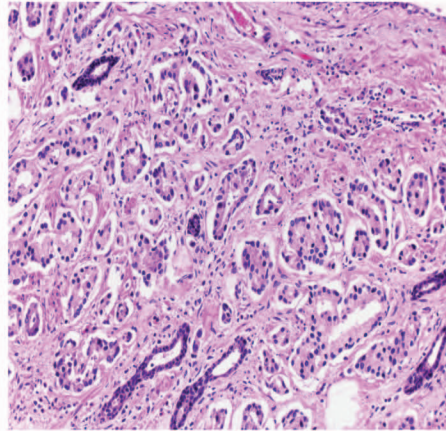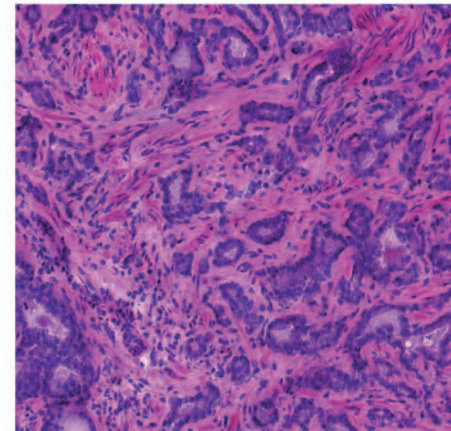

b

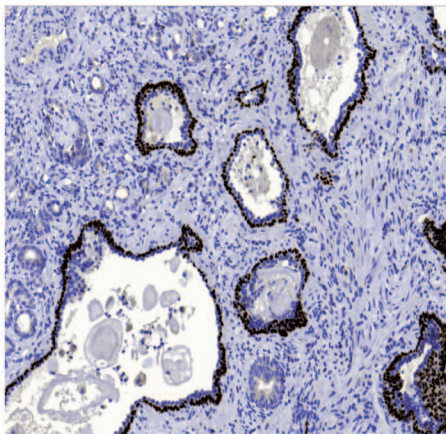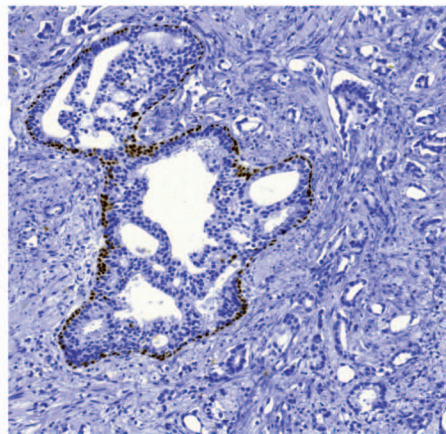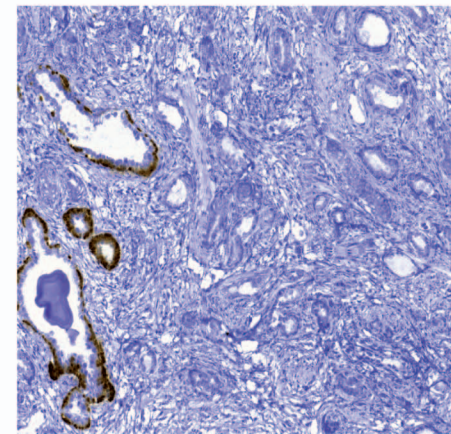

c

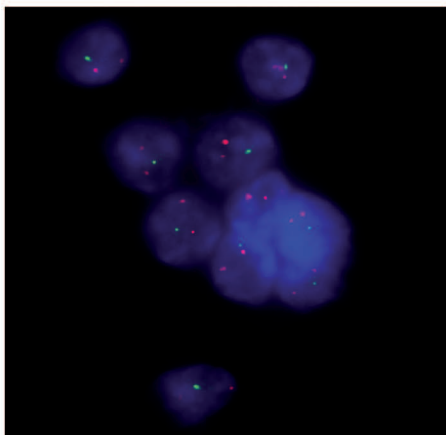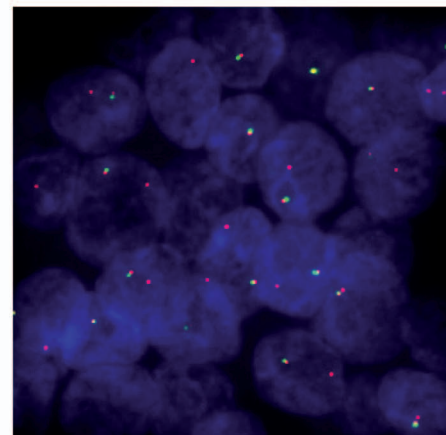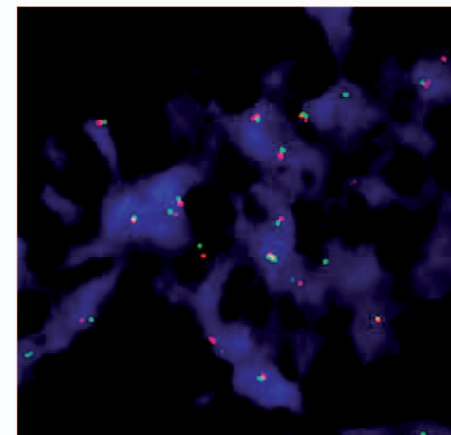

Supplement: MOESM2 [file 9462474]
